# Supplementary material for: Real-Time Flash Glucose Monitoring Had Better Effects on Daily Glycemic Control Compared With Retrospective Flash Glucose Monitoring in Patients With Type 2 Diabetes on Premix Insulin Therapy
Source: Frontiers journal article supplement (doi:10.3389/fendo.2022.832102), 2022-02-10
Supplement: Data_Sheet_1.PDF [file Data_Sheet_1.PDF]

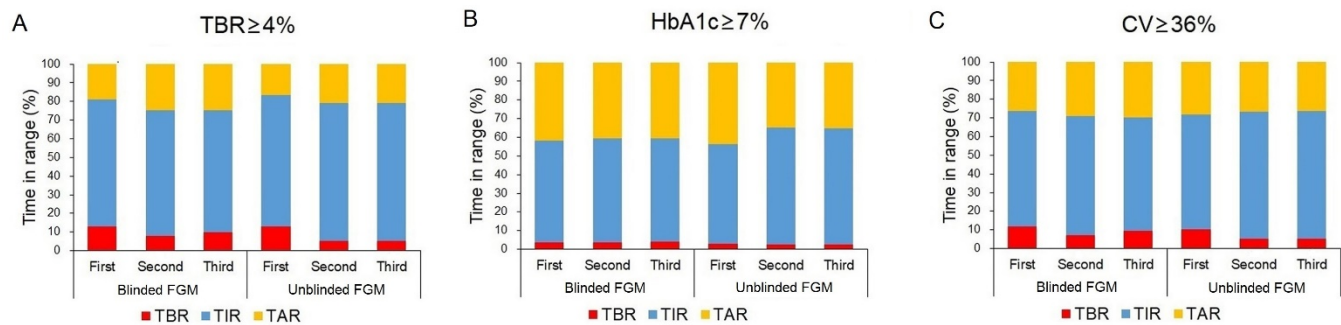

Supplementary Figure 1. Changes of daily glyemic control in different subgroup. TIR, TBR, and TAR in patients with (A)TBR  $\geq$ 4%, (B)HbA1c  $\geq$ 7%, and (C)CV $\geq$ 36% were also showed. Data are percentage.

Supplementary table 1. The proportions of hypoglycemic medications used at the endpoint.

|                           | Blinded FGM | Unblinded FGM | <i>P</i> value |
|---------------------------|-------------|---------------|----------------|
| Metformin (%)             | 40(44.9%)   | 37(44.6%)     | 0.759          |
| Acarbose (%)              | 25(28.1%)   | 22(26.5%)     | 0.865          |
| Insulin secretagogues (%) | 6(6.7%)     | 4(4.8%)       | 0.748          |
| DPP-4 inhibitors (%)      | 18(20.2%)*  | 22(26.5%)*    | 0.369          |
| TZDs (%)                  | 2(2.2%)     | 0(0%)         | 0.498          |

Data are number (percentage); data were analyzed by chi-square tests; \*, vs. baseline,  $p<0.05$ ; DPP-4, dipeptidyl peptidase 4; TZDs, thiazolidinediones.

Supplementary table 2. Changes (endpoint minus baseline) of medications and lifestyles in patients with different problems of glucose control.

|                                 | TBR $\geq 4\%$    |                                 | HbA1c $\geq 7\%$ |                              | CV $\geq 36\%$   |                               |
|---------------------------------|-------------------|---------------------------------|------------------|------------------------------|------------------|-------------------------------|
|                                 | Blinded           | Unblinded                       | Blinded          | Unblinded                    | Blinded          | Unblinded                     |
| Number                          | 40                | 33                              | 60               | 53                           | 31               | 29                            |
| HbA1c (%)                       | 0(-0.3,0.2)       | -0.2(-0.5,0.1)                  | -0.5(-0.8,-0.2)  | -0.7(-0.9,-0.4) <sup>†</sup> | 0(-0.3,0.4)      | -0.4(-0.7,0)                  |
| Exercise time (min/day)         | -14.8(-29.7,0.1)  | 7.7(-0.4,15.9) <sup>*</sup>     | -6.2(-17.1,4.7)  | 9(-1.4,19.5)                 | -14(-32.5,4.5)   | 5.9(-4.5,16.3)                |
| Calories/weight daily (kcal/kg) | 4.1(1.4,6.8)      | 0(-3.2,3.2) <sup>*†</sup>       | 1.2(-1.5,3.9)    | -1(-3.4,1.5)                 | 1.7(-1.9,5.4)    | -0.7(-3.9,2.4)                |
| Mean calories per meal (kcal)   | 123.6(64.9,182.4) | 33.5(-36.8,103.9) <sup>*†</sup> | 4.0(-47.6,55.7)  | -8.3(-60.6,44.0)             | 78.5(-5.3,162.2) | 11.6(-64.1,87.3)              |
| Carbohydrate (g)/day)           | 22(-3.7,47.8)     | 1.1(-15.6,17.9)                 | -14.3(-39,10.5)  | -13.4(-31.5,4.6)             | 9.2(-20.9,39.3)  | -3.3(-23.9,17.3)              |
| Daily meal frequency (number)   | -0.3(-0.5,-0.1)   | -0.1(-0.3,0.2)                  | -0.1(-0.3,0.1)   | -0.1(-0.3,0.1)               | -0.3(-0.5,0)     | -0.1(-0.3,0.1)                |
| Insulin dose (IU/day)           | -1.2(-2.9,0.5)    | -5.6(-8.5,-2.6) <sup>*†</sup>   | -0.7(-2.5,1.1)   | -1(-2.4,0.4)                 | -0.4(-1.9,1.1)   | -4.4(-7.6,-1.2) <sup>*†</sup> |
| Metformin dose (g/day)          | 0.1(0,0.2)        | 0(-0.1,0.1)                     | 0.1(0,0.2)       | 0(-0.1,0.1)                  | 0.1(0,0.2)       | 0(-0.1,0.1)                   |
| Metformin (n)                   | 0                 | 0                               | 2                | 0                            | 0                | 1                             |
| Acarbose (n)                    | 5                 | 0                               | -4               | 3                            | -5               | 3                             |
| DPP-4 inhibitors (n)            | 0                 | 2                               | 13               | 13                           | 3                | 3                             |

<sup>\*</sup>, for time×group in the mixed model ANOVA,  $P < 0.05$ ; <sup>†</sup>, for time in the mixed model ANOVA,  $P < 0.05$
